# Supplementary material for: Copper catalyzed alkaline aerobic lignin depolymerization: effect of botanical origin and industrial extraction process on reactivity supported through characterization
Source: Royal Society of Chemistry journal article supplement (doi:10.1039/d4su00144c), 2024-01-01
Supplement: d4su00144c1.pdf [file d4su00144c1.pdf]

## Supporting information

### **Copper Catalyzed Alkaline Aerobic lignin depolymerization: Effect of botanical origin and industrial extraction process on reactivity supported through characterizations.**

Antonio Hernández-Mañas<sup>a,b</sup>, Alex Martínez-Martin<sup>a</sup>, Johan Madignier<sup>a</sup>, Pascal Fongarland<sup>b</sup>,  
Frédérique Bertaud<sup>c</sup>, Léa Vilcocq<sup>b,\*</sup>, Laurent Djakovitch<sup>a,\*</sup>

<sup>a</sup> IRCELYON, UMR 5256, CNRS-Université de Lyon 1, 2 Avenue Albert Einstein, F-69626 Villeurbanne Cedex, Lyon, France

<sup>b</sup> CP2M, UMR 5128, CNRS-CPE-Université de Lyon 1, 43, bd du 11 novembre 1918, B.P. 82077, 69616 Villeurbanne Cedex, France

<sup>c</sup> Centre Technique du Papier, CTP, CS90251, 38044 Grenoble cedex 9, France

## Content

- **Information about lignin**
- **Mass loss determination**
- **Figures summary**

**Figure S 1:** TGA analysis under air atmosphere of the different lignin.

**Figure S 2:** FTIR-ATR spectra of the different lignin

**Figure S 3:** <sup>1</sup>H NMR spectrum of KraftSoft 1

**Figure S 4:** <sup>13</sup>C NMR spectrum of KraftSoft 1

**Figure S 5:** <sup>31</sup>P NMR after phosphorylation spectrum of KraftSoft 1

**Figure S 6:** HSQC NMR analysis of KraftSoft

**Figure S 7:** Identified structures in HSQC NMR

**Figure S 8:** HSQC NMR analysis of the different lignin, oxygenated aliphatic section

**Figure S 9:** HSQC NMR analysis of the different lignin, aromatic section

**Figure S 10:** FTIR-ATR spectra of the different Klason phases obtained from the catalytic oxidation

**Figure S 11:** Extension (1800-750 cm<sup>-1</sup>) of FTIR-ATR spectra of the different Klason phases obtained from the non-catalytic oxidation

**Figure S 12:** HSQC NMR spectra of the different Klason Phases obtained from the non-catalytic reactions, oxygenated aliphatic section

**Figure S13:** HSQC NMR spectra of the different Klason Phases obtained from the non-catalytic reactions, aromatic section

**Figure S 14:** FTIR-ATR spectra of the different Klason phases obtained from the catalytic oxidation

**Figure S 15:** Extension (1800-750 cm<sup>-1</sup>) of FTIR-ATR spectra of the different Klason phases obtained from the catalytic oxidation

**Figure S16:** HSQC-NMR spectra of the different Klason Phases obtained from the catalytic reactions, oxygenated aliphatic section

**Figure S17:** HSQC-NMR spectra of the different of the different Klason phases obtained from the catalytic oxidation, aromatic section

**Figure S 18:** Masses distribution obtained from the SEC analysis of the different Klason phases obtained from the non-catalytic oxidation (blue), and catalytic oxidation (CuO/TiO<sub>2</sub>) (green) of the different lignin in standard conditions

- **Tables summary**

**Table S 1:** Assignments of bands in FTIR-ATR spectra

**Table S 2:** Semi-quantitative <sup>1</sup>H NMR analyses of the different lignin

**Table S 3:** Quantitative <sup>13</sup>C NMR analysis of the different lignin

**Table S 4:** Quantitative <sup>31</sup>P NMR after phosphorylation analysis of the different lignin

**Table S 5:** Data obtained from the SEC analysis of the different klason phases obtained from the catalytic oxidation (CuO/TiO<sub>2</sub>) of the different lignins in standard conditions.

## Information about lignin

- KraftSoft 1: Kraft lignin from marine pine produced in Factice (France). The highly alkaline black liquor was neutralized with CO<sub>2</sub> by bubbling to precipitate lignin. After centrifugation, the recovered solid has a purity of 60 %. It was washed by dispersing it in a 2 %wt H<sub>2</sub>SO<sub>4</sub> followed by centrifugation. After three purification cycles and drying, a purity of 92 % was achieved.
- KraftSoft 2: Kraft lignin also from marine pine and produced in Factice (France). This lignin was extracted from the Black liquor in “Centre Technique du Papier” (CTP). The black liquor was acidified with CO<sub>2</sub> until pH 9. Lignin was then washed with organic acids and purified with ion exchange.
- KraftSoft 3 (BioPiva™ 100): Kraft lignin from southern pine produced by DOMTAR-Plymouth factory (US). Lignin was extracted from the black liquor by CO<sub>2</sub> precipitation, followed by a strong acid acidification.
- KraftHard (Eucalyptus Kraft Lignin): Eucalyptus kraft lignin produced on pilot scale at the Jacarei factory (Brazil).
- OrganoSoft: This lignin was obtained from marine pine in laboratory. It was synthesized by the organosolv pulping method in laboratory scale. The synthesis started with a pulverization until presenting a particle size lower than 0.5 mm. The biomass was suspended in a solvent composed by 60 %wt of ethanol and 40 %wt of water, obtaining a concentration of 100 g Biomass.L<sup>-1</sup>. The mixture was cooked at 190-200°C for 3 hours. The pulp was removed from the organosolv liquor by filtration, and lignin was extracted from it by precipitation upon dilution with water at 4°C during 12 hours. This was finally filtrated and washed with water.
- OrganoHerb (BioLignine™): This lignin was obtained from wheat straw. It was produced on pilot scale by the CIMV process (organosolv) in Pomacle (France), and provided by the supplier. The process employs a conveyor belt, where the biomass is deposited. Lignin is then solubilized by adding acetic acid and formic acid. The process is carried out for three hours at 100°C and atmospheric pressure. The acids are recycled until reaching the saturation in lignin and hemicellulose.
- SodaHerb (Protobind 1000): This lignin was also obtained from wheat straw, and produced in India by the soda process. The pH was reduced at a relatively low temperature, typically between 15 and 60 °C, before then reheating the dispersion until it converts to a filterable form, typically between 50 and 90 °C. Lignin was then separated by filtration and washed and then dried at high temperature, in particular up to 110 °C.

## Mass loss determination

The following procedure was used to determine the origin of the mass losses observed during our experiment. It is described for Kraftsoft 1 lignin, and can be applied to other lignin.

A significant mass loss is observed in every experiments. In order to quantify this mass loss due to the manipulation of the solution reaction, a fractionation process was carried out without running any reaction. This was developed by diluting lignin in the same standard conditions as for a reaction run (5 g.L<sup>-1</sup> lignin in basic aqueous medium with 10 g.L<sup>-1</sup> NaOH), and then initiating the Fractionation protocol (Figure 1, main paper). The figure bellow show that the mass loss in this case is close to 11%wt, which is an acceptable deviation.

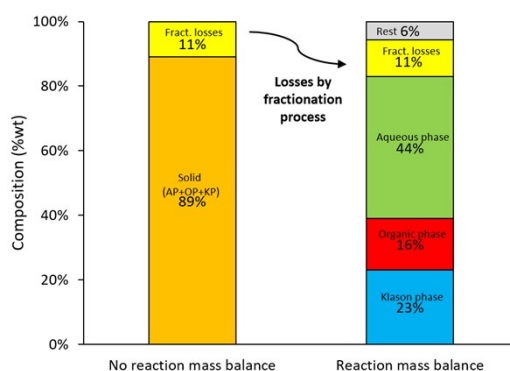

At reaction completion upon acidification of the reaction medium CO<sub>2</sub> would be released as gas. This has been systematically observed after each run, and produce a significant quantity of foam:

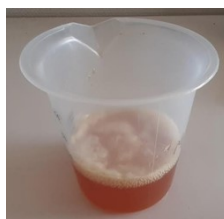

**Reaction medium after acidification.**

To discriminate organic and inorganic carbon, quantification was carried out via total carbon analysis (TC). Most of the carbon present in the reaction mixture corresponds to organic carbon link to the products of reaction (ca. 91%wt); nevertheless, a significant quantity (9%wt) is present as inorganic carbon (mainly carbonates). Thus, compared to the carbon-based mass balance of the reaction products, it can be observed that the lack of matter can be assimilated to gases production:

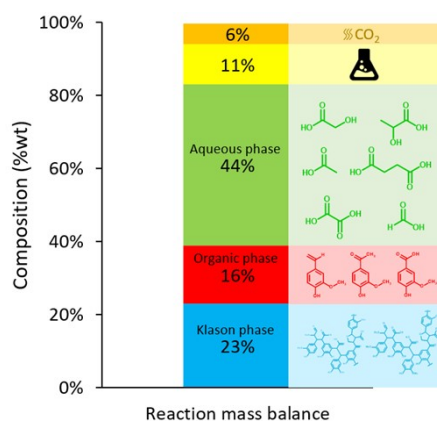

**Complete mass balance of the lignin oxidation reaction (Standard reaction conditions: 150°C, 20 bars air, 60 minutes).**

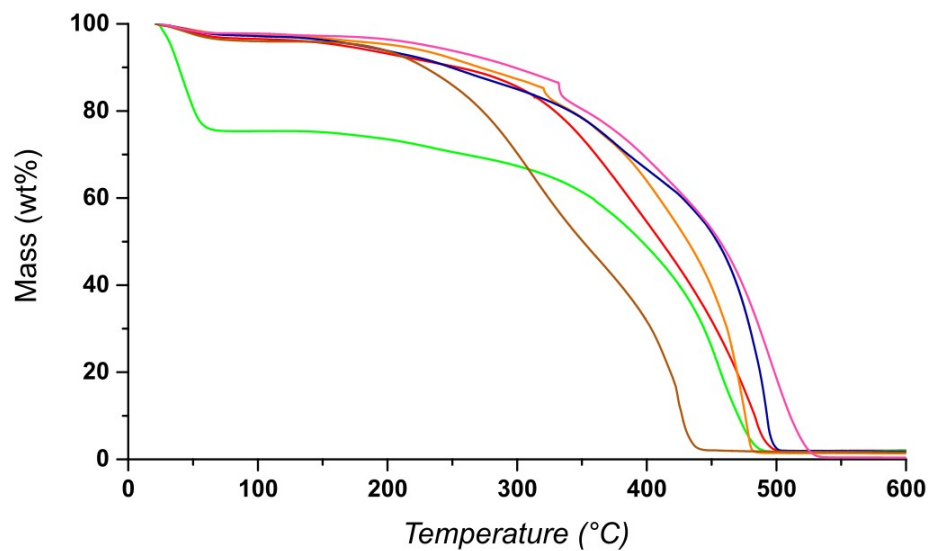

**Figure S 1:** TGA analysis under air atmosphere of the different lignin: KraftSoft 2 (red), KraftSoft 3 (green), KraftHard (orange), OrganoSoft (pink) OrganoHerb (brown) and SodaHerb (blue). TGA of Kraftsoft 1 lignin was previously reported.<sup>[1]</sup>

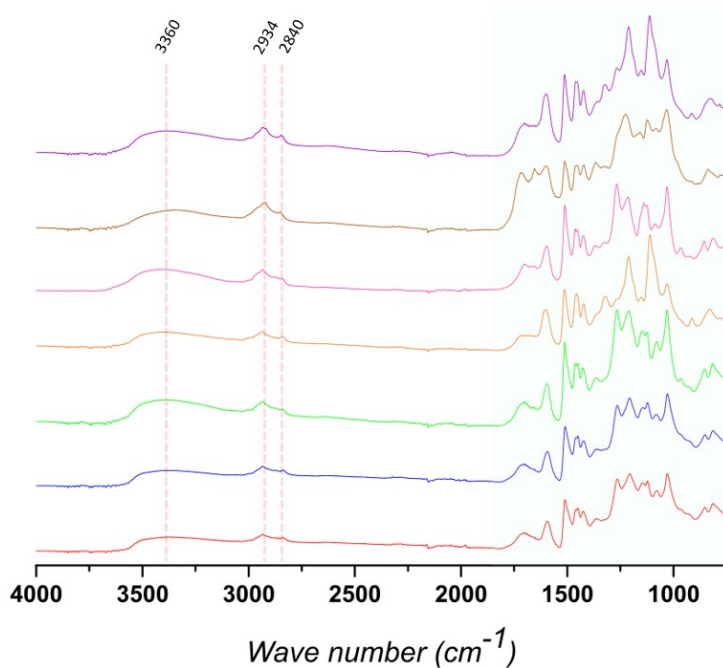

**Figure S 2:** FTIR-ATR spectra of the different lignin: KraftSoft 1 (red), KraftSoft 2 (blue), KraftSoft 3 (green), KraftHard (orange), OrganoSoft (pink), OrganoHerb (brown) and SodaHerb (violet)

**Table S 1:** Assignments of bands in FTIR-ATR spectra

| Wave number (cm <sup>-1</sup> ) | Assignment                                                                                       |
|---------------------------------|--------------------------------------------------------------------------------------------------|
| 3360                            | <b>O-H</b> stretch ( $\nu$ )                                                                     |
| 2934                            | <b>C-H</b> stretch (Aliphatic) ( $\nu$ )                                                         |
| 2840                            | <b>C-H</b> stretch (Aliphatic) ( $\nu$ )                                                         |
| 1694                            | <b>C=O</b> stretch (Non-conjugated) ( $\nu$ )                                                    |
| 1650                            | <b>C=O</b> stretch (Conjugate) ( $\nu$ )                                                         |
| 1588                            | <b>C-H (Aromatic ring)</b> deformation, symmetric ( $\delta$ ), and <b>C=O</b> stretch ( $\nu$ ) |
| 1504                            | <b>C=C (Aromatic ring)</b> stretch, asymmetric ( $\nu$ )                                         |
| 1452                            | <b>C-H</b> deformation, asymmetric ( $\delta$ )                                                  |
| 1420                            | <b>Aromatic ring</b> stretching ( $\nu$ )                                                        |
| 1370                            | <b>C-H</b> (Aliphatic), <b>O-H</b> (Phenolic) stretches ( $\nu$ )                                |
| 1329                            | <b>Syringyl unit</b> and guaiacyl condensate                                                     |
| 1264                            | <b>C=O</b> stretch (G unit) ( $\nu$ )                                                            |
| 1206                            | <b>C-C</b> , <b>C-O</b> and <b>C=O</b> stretches (G unit)                                        |
| 1140                            | <b>C-H</b> deformation (G unit) ( $\delta$ )                                                     |
| 1120                            | <b>C-O</b> (2ary alcohols), <b>and C=O</b> (S unit) stretches ( $\nu$ )                          |
| 1085                            | <b>C-O</b> (2ary alcohols), and <b>R-O-R</b> (Aliphatic) deformations ( $\delta$ )               |
| 1028                            | <b>C-H</b> (G unit), <b>C-O</b> (2ary alcohol) and <b>C=O</b> stretch (Non conjugate) ( $\nu$ )  |
| 915                             | <b>C-H</b> deformation (aromatic, out of plane) ( $\delta$ )                                     |
| 834                             | <b>C-H</b> deformation (aromatic, out of plane) ( $\delta$ )                                     |

**Table S 2:** Semi-quantitative <sup>1</sup>H NMR analyses of the different lignin

| mmol H /g Lignin                            | KraftSoft 1 | KraftSoft 2 | KraftSoft 3 | KraftHard   | OrganoSoft  | OrganoHerb  | SodaHerb    |
|---------------------------------------------|-------------|-------------|-------------|-------------|-------------|-------------|-------------|
| Aliphatic H<br>(0.5-2.3 ppm)                | 7.0         | 6.4         | 4.0         | 4.1         | 10.4        | 12.8        | 8.4         |
| Oxygenated<br>Aliphatic H<br>(2.7-5 ppm)    | 37.8        | 36.9        | 44.0        | 37.1        | 34.3        | 34.4        | 33.8        |
| Unsaturated<br>Aliphatic H<br>(5.1-5.8 ppm) | 0.8         | 0.8         | 0.4         | 0.6         | 1.3         | 1.3         | 0.6         |
| Aromatic H<br>(6.1-7.6 ppm)                 | 10.9        | 9.2         | 5.8         | 7.4         | 11.9        | 5.5         | 7.4         |
| Phenolic OH<br>(8.0-9.2 ppm)                | 2.1         | 2.2         | 1.5         | 2.9         | 2.4         | 1.3         | 1.9         |
| CHO<br>(9.3-9.9 ppm)                        | 0.4         | 0.3         | 0.2         | 0.5         | 0.4         | 0.2         | 0.3         |
| COOH<br>(10.9-13.6 ppm)                     | -           | 0.3         | 0.2         | 0.5         | 0.2         | 0.4         | 0.5         |
| <b>Total H</b>                              | <b>59.0</b> | <b>56.0</b> | <b>56.0</b> | <b>53.0</b> | <b>61.0</b> | <b>56.0</b> | <b>53.0</b> |
| Total H (%wt)                               | 5.9         | 5.6         | 5.6         | 5.3         | 6.1         | 5.6         | 5.3         |

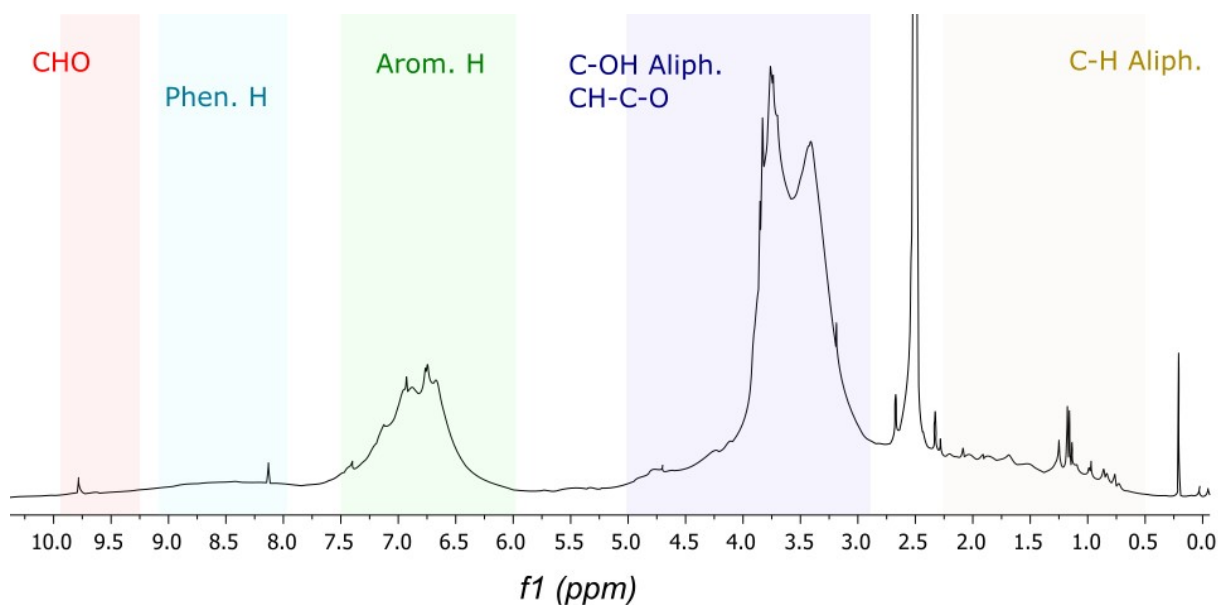**Figure S 3:** <sup>1</sup>H NMR spectrum of KraftSoft 1

**Table S 3:**  
Quantitative <sup>13</sup>C  
NMR analysis of  
the different  
lignin,  
employing  
tetramethylthiou  
rea as standard

| mmol C<br>/ g lignin                                    | KraftSoft 1 | KraftSoft 2 | KraftSoft 3 | KraftHard | Organosoft | OrganoHerb | SodaHerb |
|---------------------------------------------------------|-------------|-------------|-------------|-----------|------------|------------|----------|
| Aliphatic C<br>(36-10 ppm)                              | 6,1         | 3,5         | 4,3         | 2,1       | 2,6        | 4,7        | 2,2      |
| CH <sub>3</sub> -O<br>(58-54 ppm)                       | 2,0         | 4,0         | 2,7         | 3,1       | 2,4        | 1,2        | 2,1      |
| Aliphatic C-O<br>(non CH <sub>3</sub> O)<br>(90-53 ppm) | 4,5         | 8,3         | 6,4         | 5,1       | 6,8        | 4,3        | 4,0      |
| Total aliphatic C<br>(90-10 ppm)                        | 12,6        | 15,8        | 13,4        | 10,3      | 11,8       | 10,2       | 8,3      |
| Aromatic C-H<br>(125-102 ppm)                           | 6,4         | 12,7        | 7,6         | 5,2       | 8,4        | 2,3        | 4,6      |
| Aromatic C-C<br>(142-125 ppm)                           | 5,2         | 10,0        | 6,2         | 5,0       | 5,7        | 1,5        | 4,1      |
| Aromatic C-O<br>(162-142 ppm)                           | 5,7         | 9,8         | 6,3         | 4,4       | 5,6        | 1,7        | 4,0      |
| Total aromatic C<br>(162-102 ppm)                       | 17,2        | 32,5        | 20,1        | 14,6      | 19,7       | 5,4        | 12,6     |
| COOR<br>(166-175 ppm)                                   | 0,8         | 0,8         | 0,5         | 0,1       | 0,1        | 0,6        | 0,6      |
| Total C                                                 | 28,7        | 45,0        | 31,3        | 21,9      | 29,1       | 15,0       | 19,4     |
| Total C (%wt)                                           | 34%         | 54%         | 38%         | 26%       | 35%        | 18%        | 23%      |
| Total C (%wt)<br>(Elemental<br>analysis)                | 62%         | 71%         | 66%         | 63%       | 66%        | 62%        | 65%      |
| C analyzed by<br><sup>13</sup> C-NMR                    | 55%         | 76%         | 57%         | 42%       | 53%        | 29%        | 36%      |

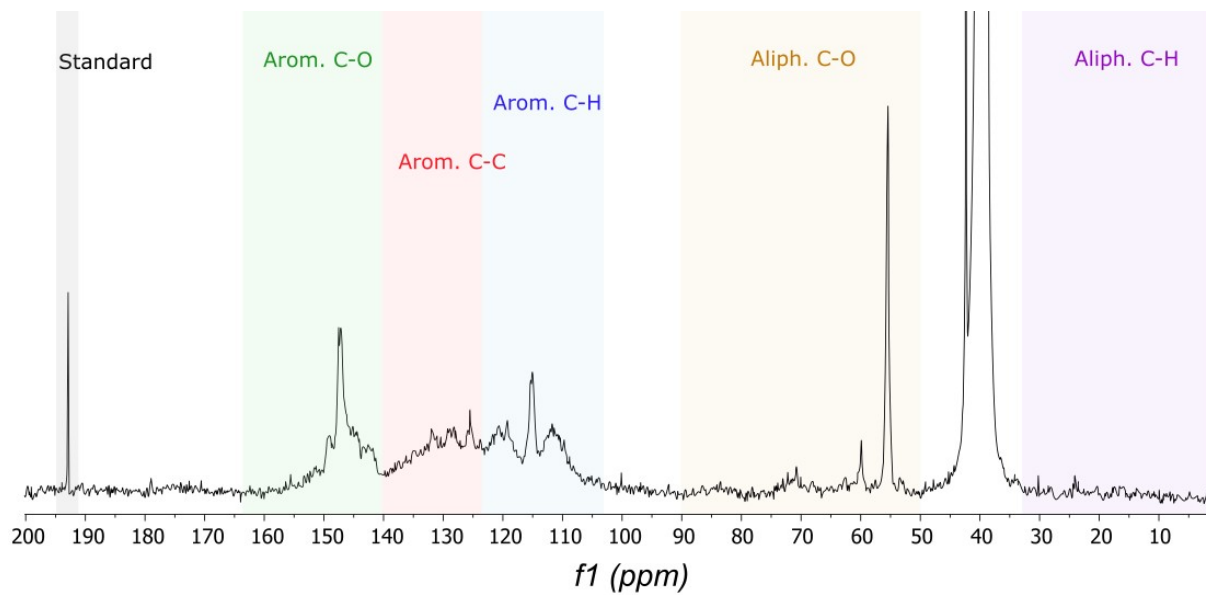

**Figure S 4:**  $^{13}\text{C}$  NMR spectrum of KraftSoft 1



**Table S 4:** Quantitative  $^{31}\text{P}$  NMR after phosphorylation analysis of the different lignin

| mmol O/ g lignin                                          | KraftSoft 1 | KraftSoft 2 | KraftSoft 3 | KraftHard | OrganoSoft | OrganoHerb | SodaHerb |
|-----------------------------------------------------------|-------------|-------------|-------------|-----------|------------|------------|----------|
| <b>Aliphatic OH</b><br>(149.1-145.6 ppm)                  | 2.28        | 2.59        | 1.91        | 2.33      | 2.3        | 2.95       | 2.24     |
| <b>Syringyl OH +<br/>Condensates</b><br>(144.3-140.2 ppm) | 2.10        | 1.80        | 1.92        | 3.44      | 1.59       | 1.29       | 2.38     |
| <b>Guaiacyl OH</b><br>(140.2-138.7 ppm)                   | 2.07        | 1.77        | 1.95        | 0.89      | 2.20       | 0.74       | 0.93     |
| <b>P-hydroxyphenyl<br/>OH</b><br>(138.6-136.9 ppm)        | 0.36        | 0.26        | 0.34        | 0.27      | 0.25       | 0.44       | 0.35     |
| <b>Total<br/>Phenolic OH</b>                              | 4.53        | 3.83        | 4.21        | 4.6       | 4.04       | 3.66       | 2.47     |
| <b>Carboxylic acids<br/>OH</b><br>(135.6-134.0 ppm)       | 0.41        | 0.49        | 0.52        | 0.67      | 0.50       | 0.96       | 0.91     |
| <b>Total O</b>                                            | 4.79        | 4.89        | 4.34        | 6.44      | 4.40       | 5.21       | 5.53     |
| <b>Total O (%wt)</b>                                      | 11.5%       | 11.1%       | 10.6%       | 12.2%     | 10.9%      | 10.2%      | 10.9%    |
| <b>Total O (%wt)<br/>(Elemental<br/>analysis)</b>         | 29.1%       | 21.3%       | 21.1%       | 26.4%     | 27.7%      | 28.0%      | 25.5%    |
| <b>O analyzed par<br/><math>^{31}\text{P}</math>-NMR</b>  | 39.7%       | 52.0%       | 50.3%       | 46.0%     | 39.4       | 36.5%      | 42.7%    |

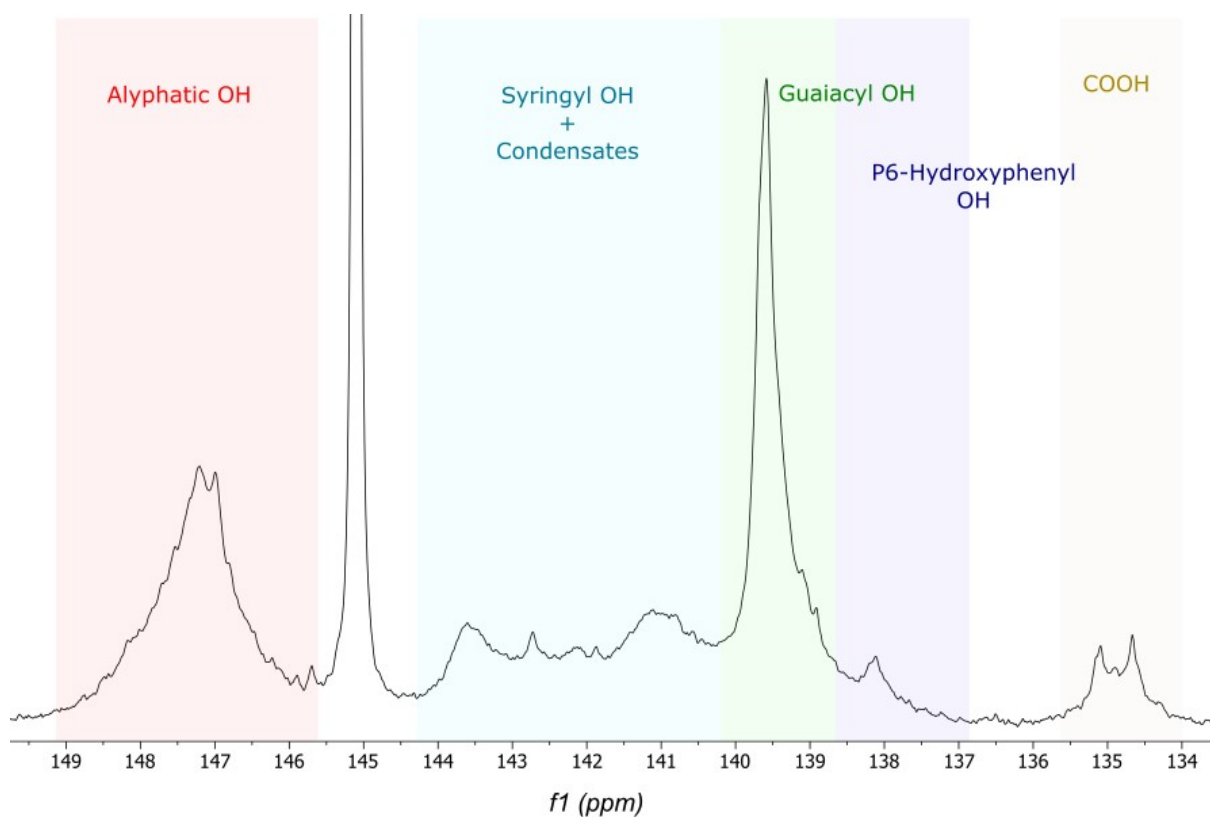**Figure S 5:**  $^{31}\text{P}$  NMR after phosphorylation spectrum of KraftSoft 1

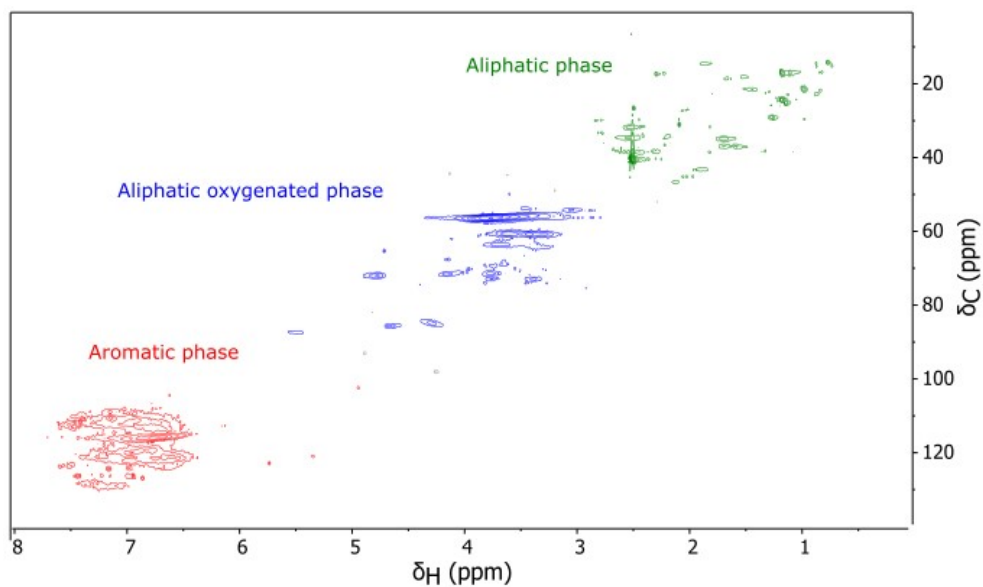

Figure S 6: HSQC NMR analysis of KraftSoft 1

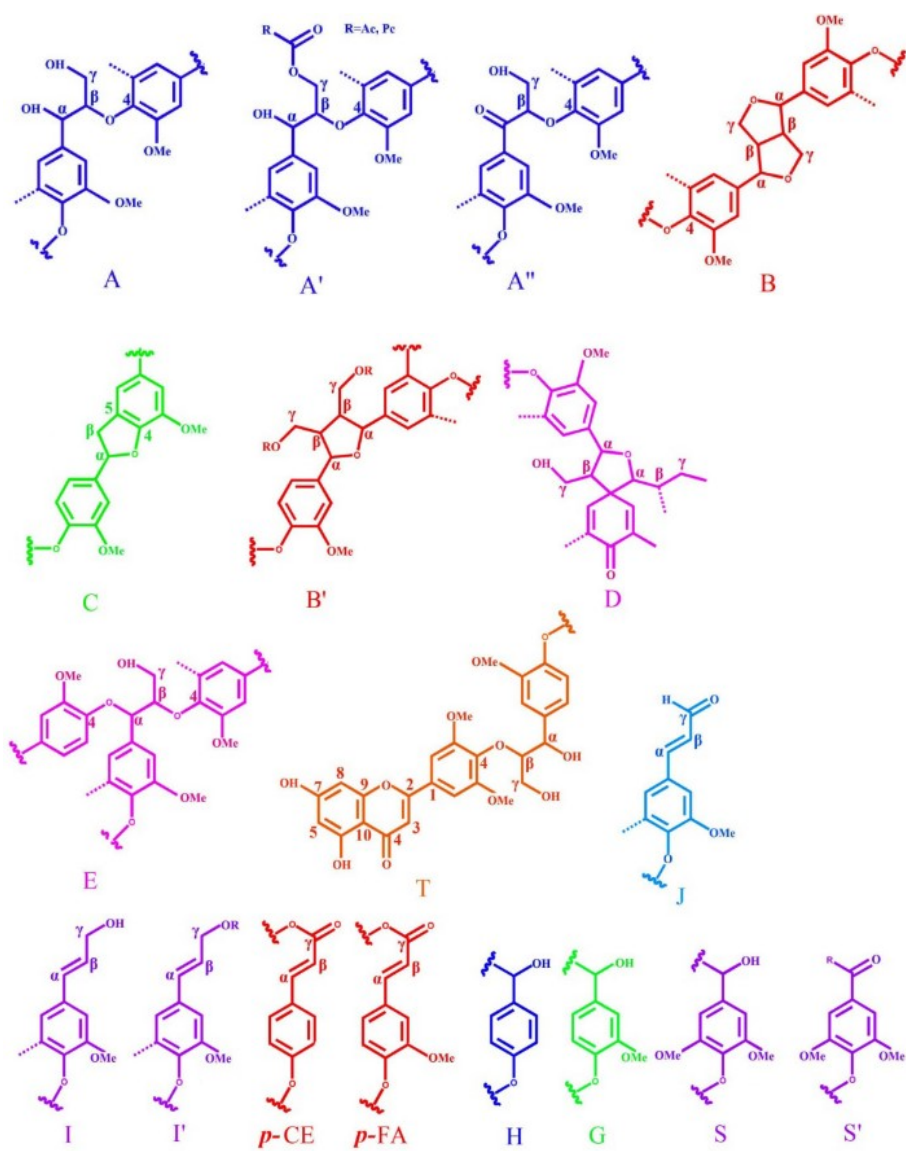

Figure S 7: Identified structures in HSQC NMR.<sup>[2]</sup>

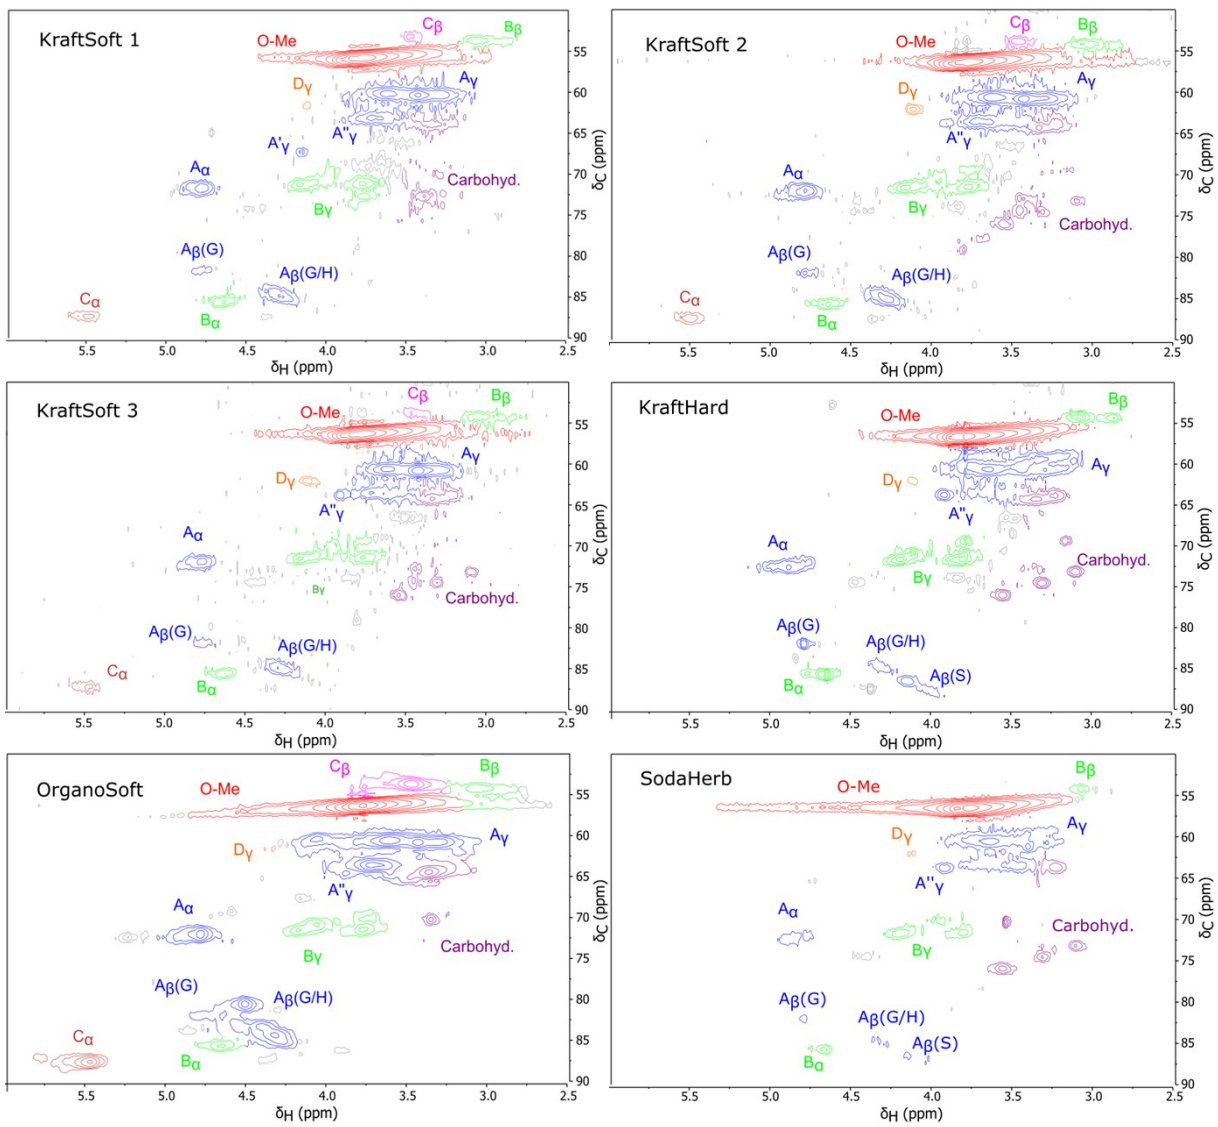

**Figure S 8:** HSQC NMR analysis of the different lignin, oxygenated aliphatic section

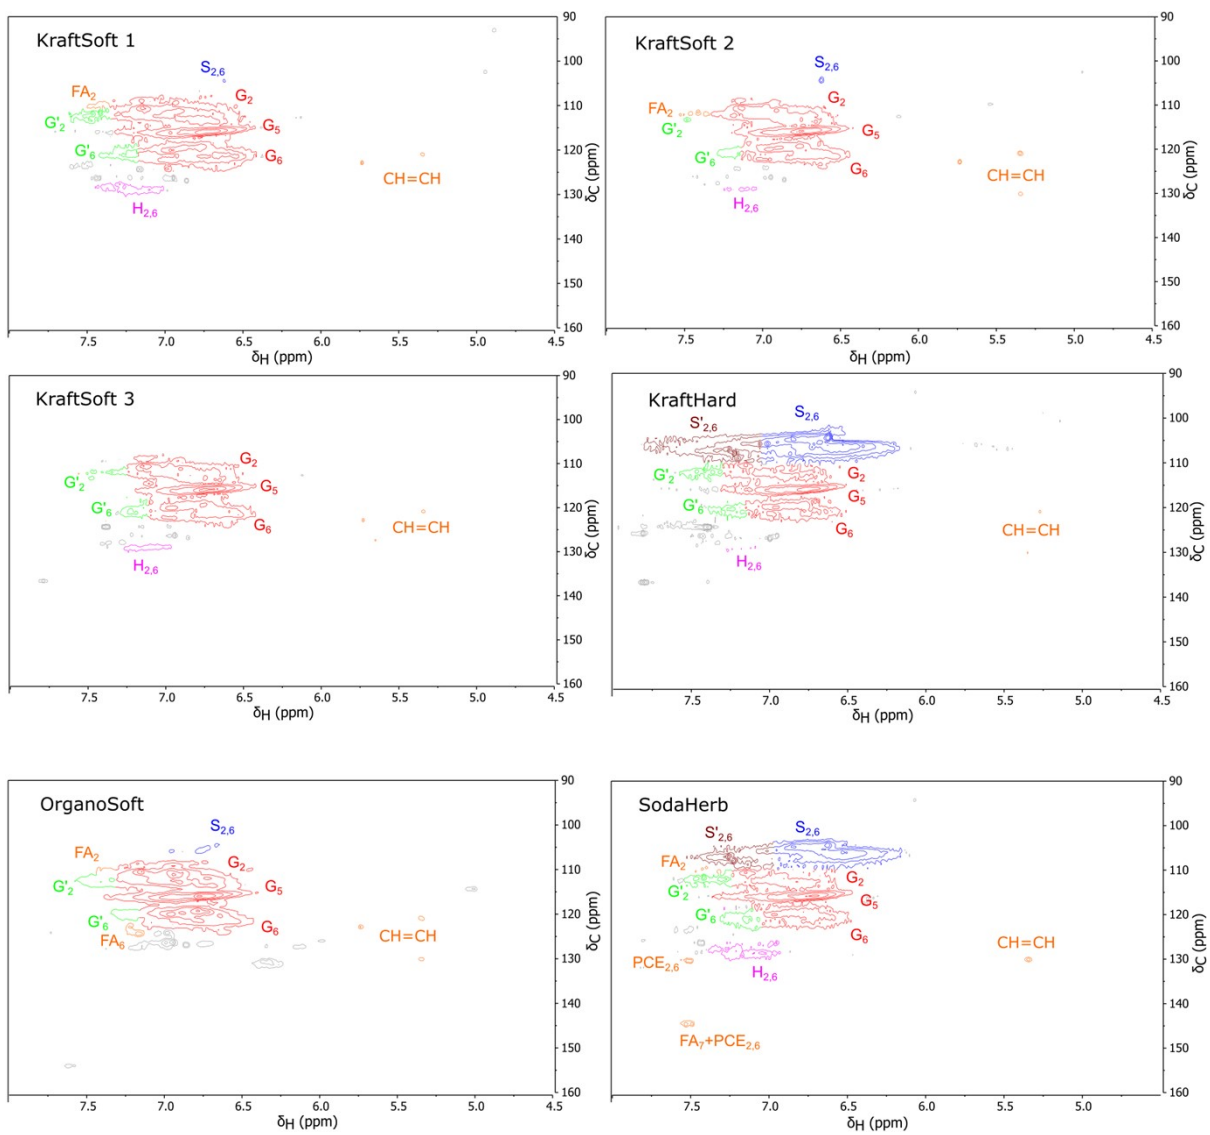

**Figure S 9:** HSQC NMR analysis of the different lignin, aromatic section

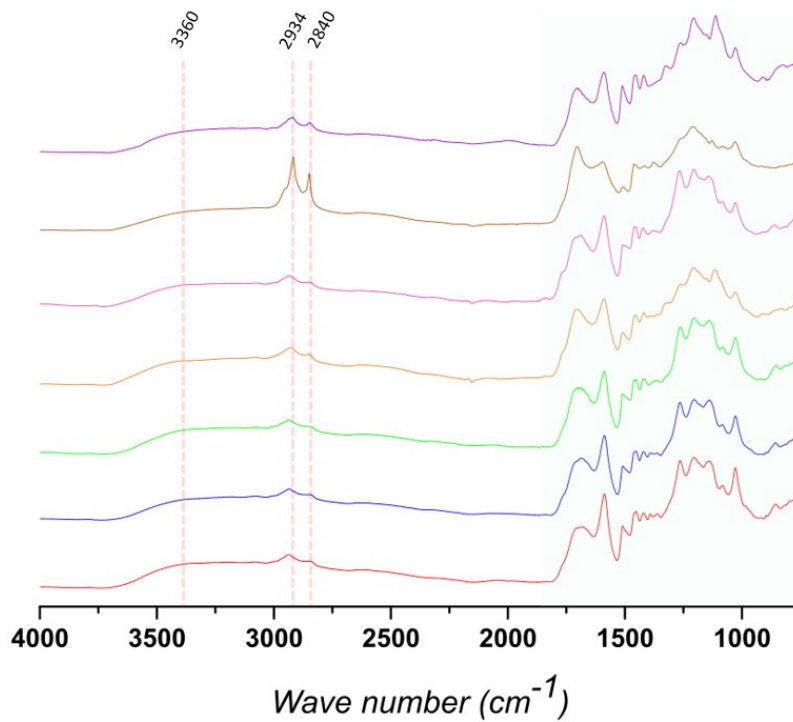

**Figure S 10:** FTIR-ATR spectra of the different Klason phases obtained from the catalytic oxidation: KraftSoft 1 (red), KraftSoft 2 (blue), KraftSoft 3 (green), KraftHard (orange), OrganoHerb (brown) and SodaHerb (violet).

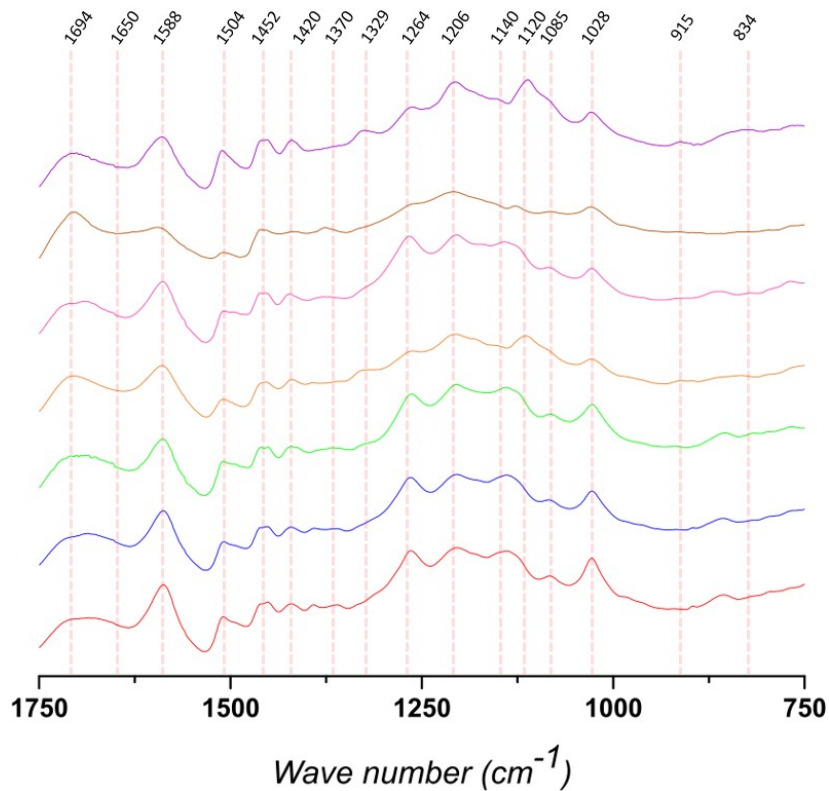

**Figure S 11:** Extension (1800-750  $\text{cm}^{-1}$ ) of FTIR-ATR spectra of the different Klason phases obtained from the non-catalytic oxidation: KraftSoft 1 (red), KraftSoft 2 (blue), KraftSoft 3 (green), KraftHard (orange), OrganoSoft (pink), OrganoHerb (brown) and SodaHerb (violet)

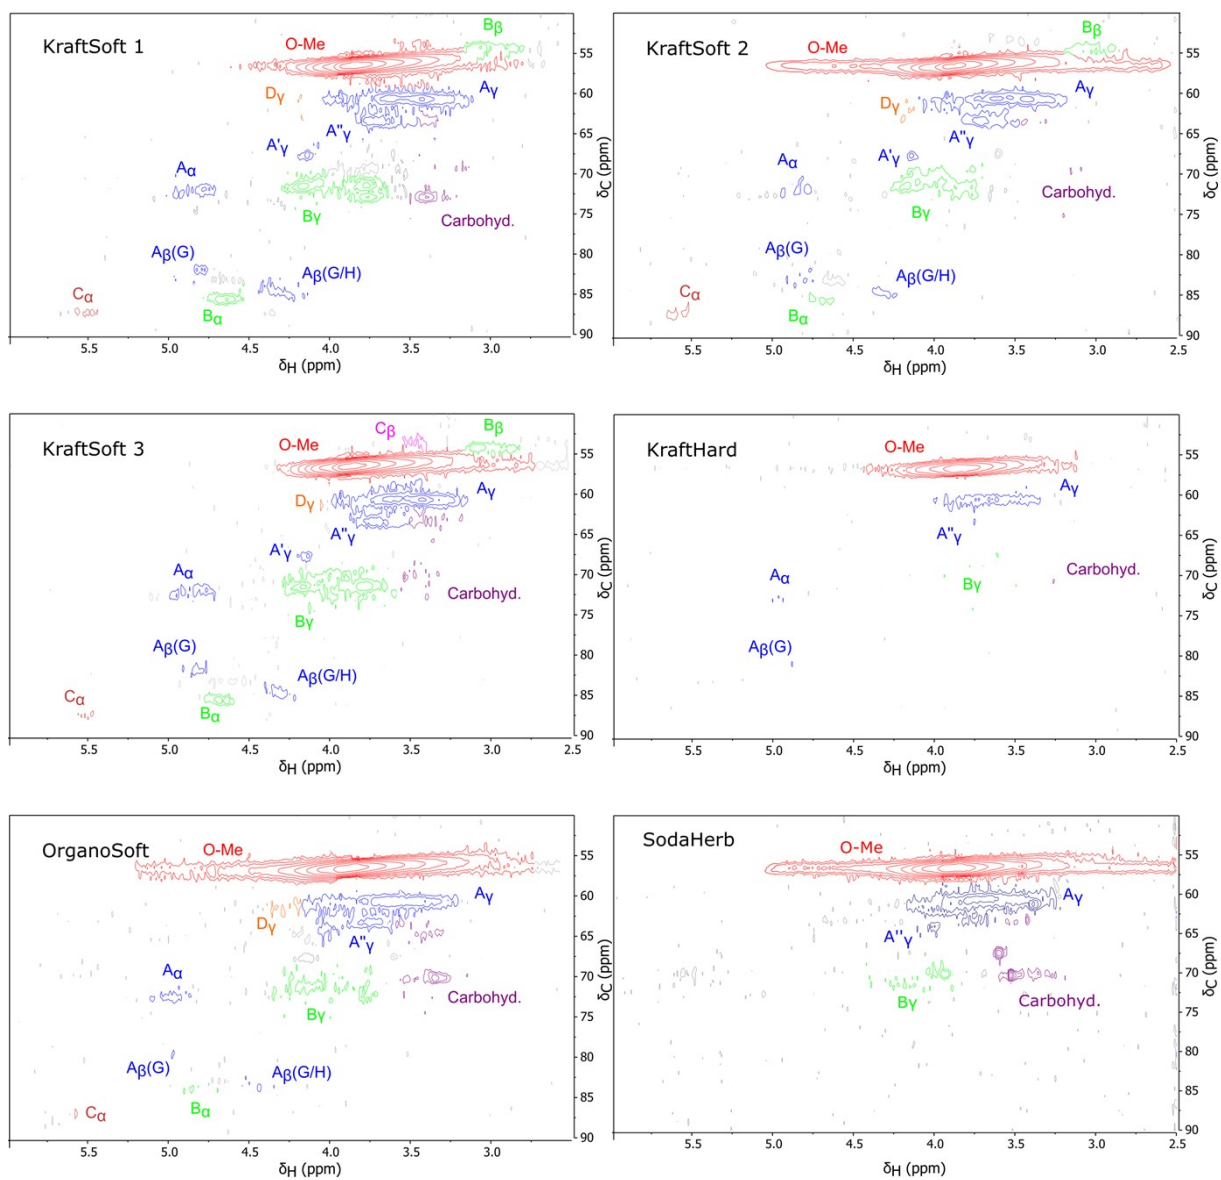

**Figure S12:** HSQC NMR spectra of the different Klason Phases obtained from the non-catalytic reactions, oxygenated aliphatic section

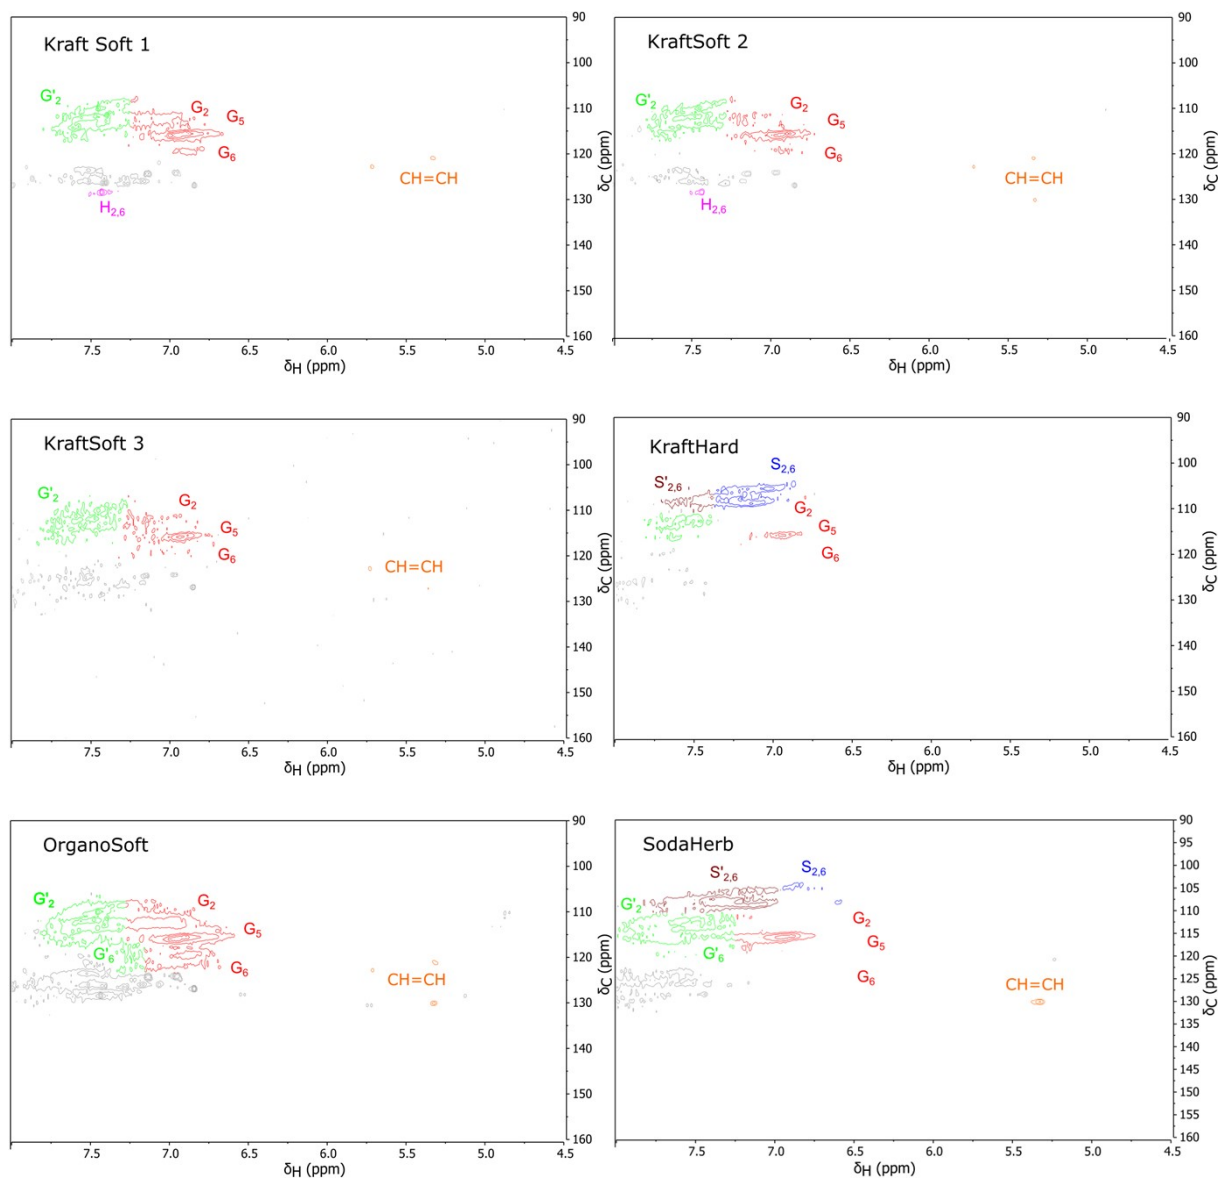

**Figure S13:** HSQC NMR spectra of the different Klason Phases obtained from the non-catalytic reactions, aromatic section

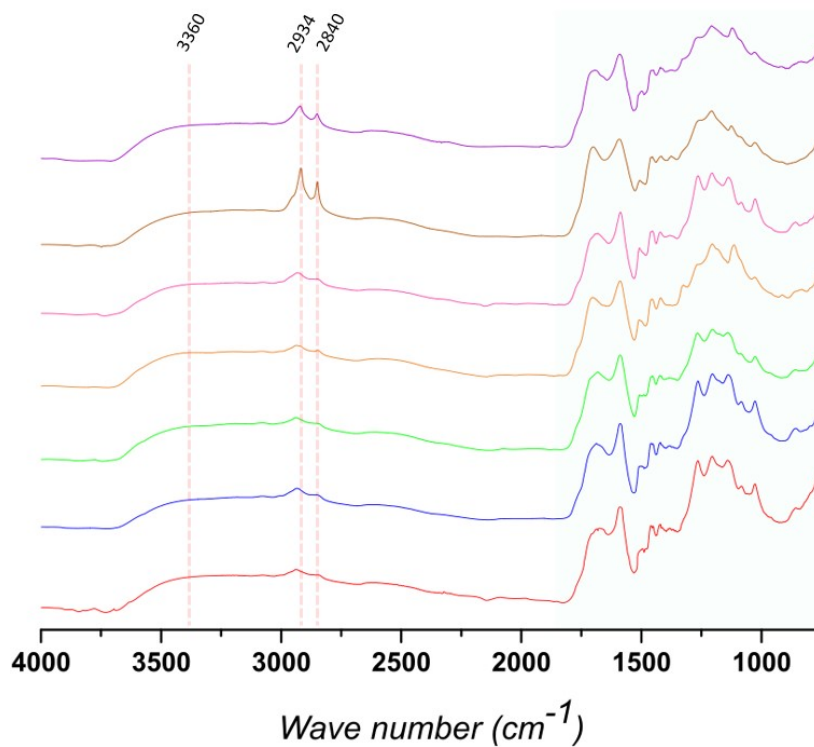

**Figure S 14:** FTIR-ATR spectra of the different Klason phases obtained from the catalytic oxidation: KraftSoft 1 (red), KraftSoft 2 (blue), KraftSoft 3 (green), KraftHard (orange), OrganoHerb (brown) and SodaHerb (violet).

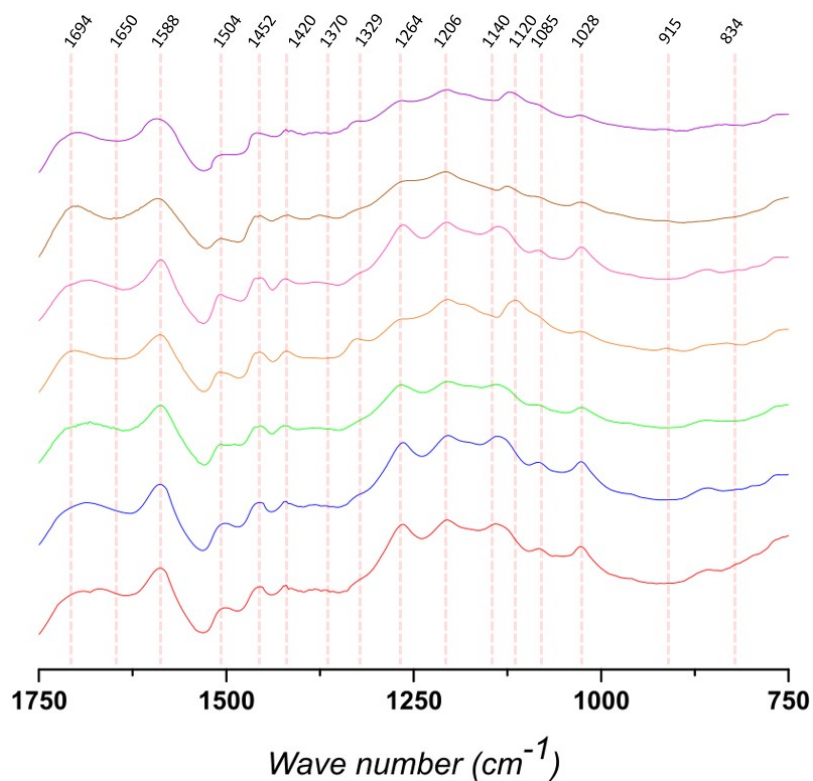

**Figure S 15:** Extension (1800-750  $\text{cm}^{-1}$ ) of FTIR-ATR spectra of the different Klason phases obtained from the catalytic oxidation: KraftSoft 1 (red), KraftSoft 2 (blue), KraftSoft 3 (green), KraftHard (orange), OrganoSoft (pink), OrganoHerb (brown) and SodaHerb (violet)



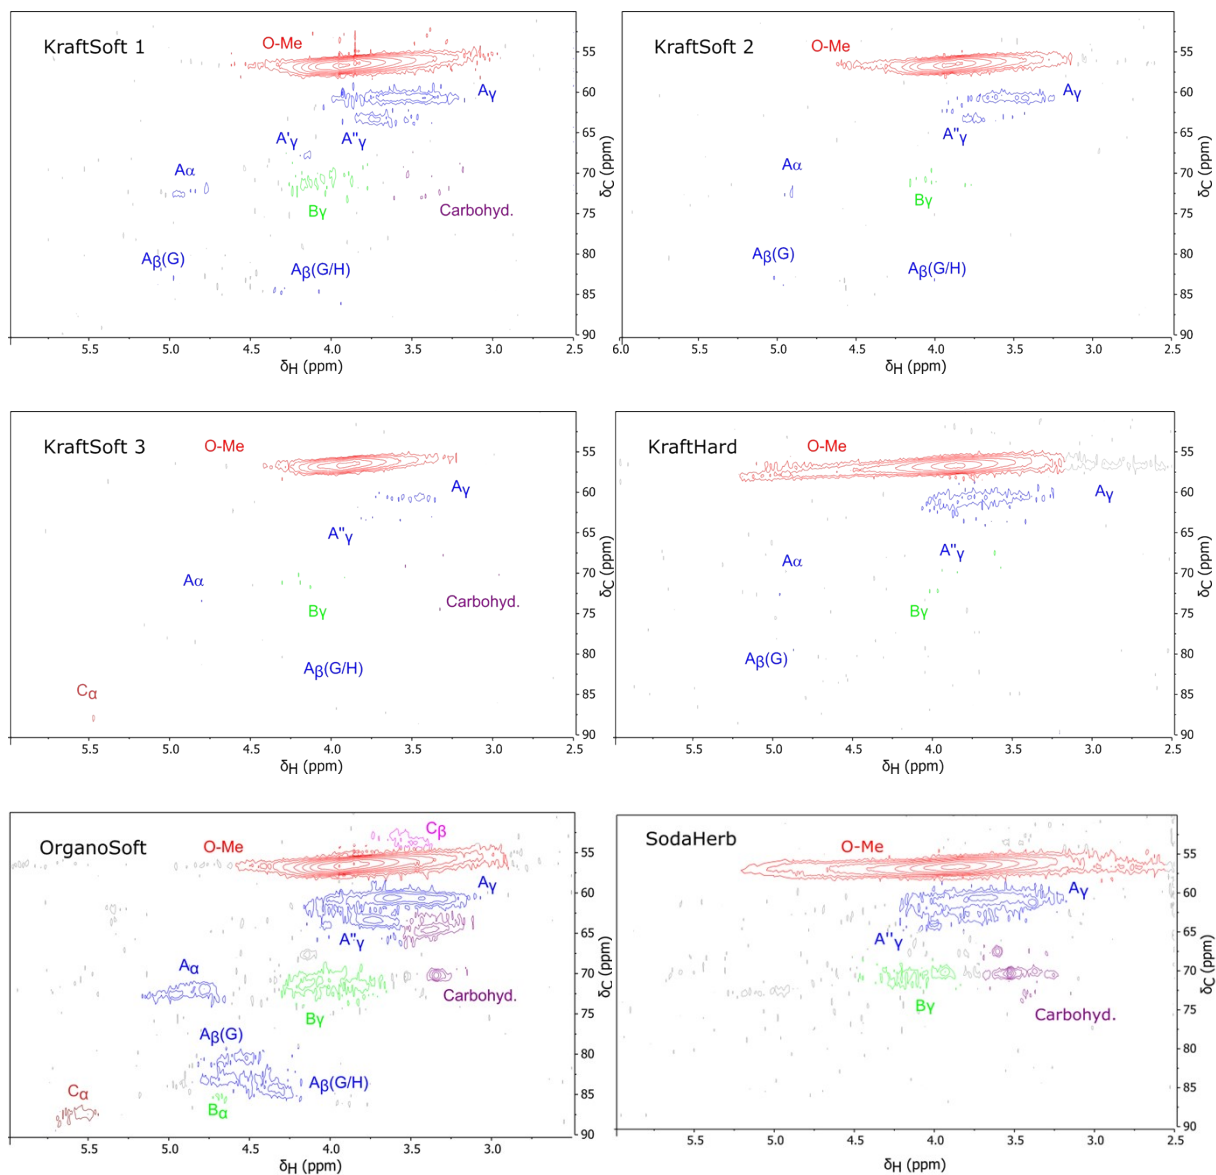

**Figure S16:** HSQC-NMR spectra of the different Klason Phases obtained from the catalytic reactions, oxygenated aliphatic section

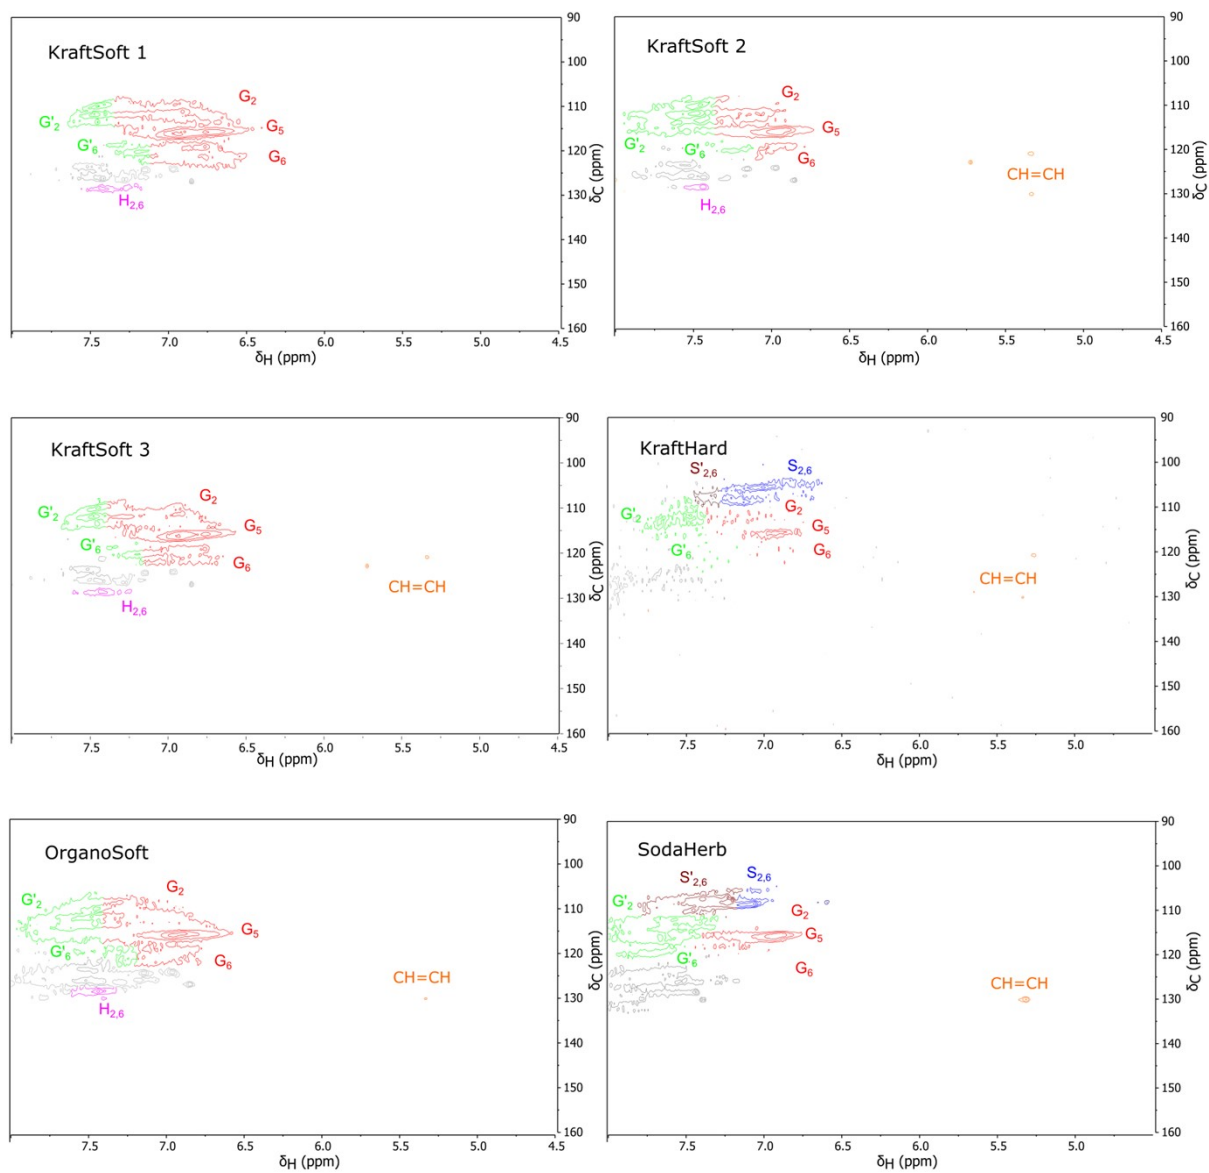

**Figure S17:** HSQC-NMR spectra of the different of the different Klason phases obtained from the catalytic oxidation, aromatic section.

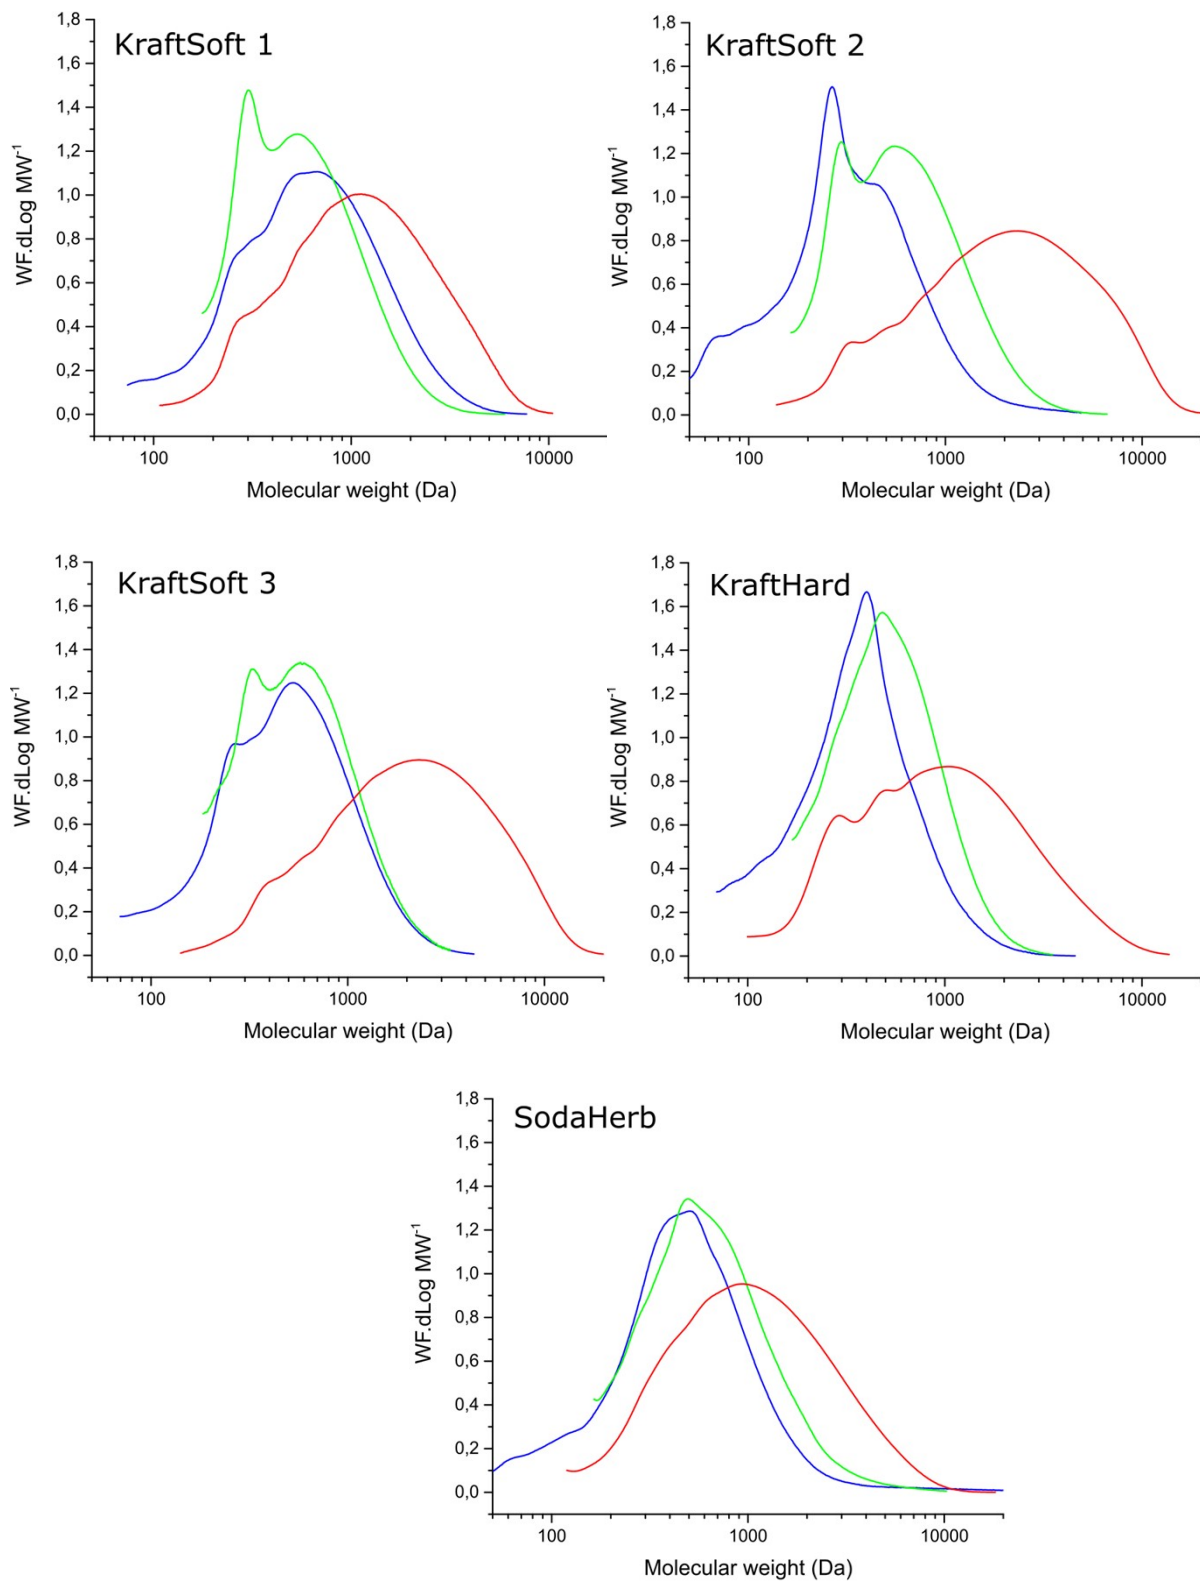

**Figure S 18:** Masses distribution obtained from the SEC analysis of the different Klason phases obtained from the non-catalytic oxidation (blue), and catalytic oxidation ( $CuO/TiO_2$ ) (green) of the different lignin in standard conditions.

**Table S 5:** Data obtained from the SEC analysis of the different klason phases obtained from the catalytic oxidation (CuO/TiO<sub>2</sub>) of the different lignins in standard conditions.

| Lignin      | Mn<br>(g/mol) | Mw<br>(g/mol) | Mw/Mn | Polymerization<br>degree aver.<br>(Mw/Mmon.) |
|-------------|---------------|---------------|-------|----------------------------------------------|
| KraftSoft 1 | 303           | 455           | 1.5   | 2.7                                          |
| KraftSoft 2 | 473           | 731           | 1.5   | 4.4                                          |
| KraftSoft 3 | 465           | 663           | 1.4   | 4.0                                          |
| KraftHard   | 439           | 603           | 1.4   | 3.6                                          |
| OrganoSoft  | 415           | 856           | 2.1   | 5.2                                          |
| SodaHerb    | 498           | 814           | 1.6   | 4.9                                          |

[1] A. Hernández Mañas, L. Vilcocq, P. Fongarland, L. Djakovitch, *Wastes Biomass Valor.* **2023**, *14*, 3789.

[2] J.-L. Wen, S.-L. Sun, B.-L. Xue, R.-C. Sun, *Materials* **2013**, *6*, 359.
